# Supplementary material for: Synthesis and characterization of reduced graphene oxide/spiky nickel nanocomposite for nanoelectronic applications
Source: Royal Society of Chemistry journal article supplement (doi:10.1039/c5tc02619a), 2015-01-01
Supplement: c5tc02619a1.pdf [file c5tc02619a1.pdf]

## Electronic Supplementary Material

### **Synthesis and characterization of reduced graphene oxide /spiky nickel nanocomposites for nanoelectronic applications**

*Maryam Salimian<sup>a</sup>, Maxim Ivanov<sup>b</sup>, Francis Leonard Deepak<sup>c</sup>, Dmitri Petrovykh<sup>c</sup>, Igor Bdikin<sup>a,b</sup>, Marta Ferro<sup>d</sup>, Andre Kholkin<sup>b</sup>, Elby Titus<sup>a</sup> and Gil Goncalves<sup>a\*</sup>*

*<sup>a</sup>TEMA-NRD, Mechanical Engineering Department, University of Aveiro, 3810-193 Aveiro, Portugal*

*<sup>b</sup>CICECO-Materials Institute of Aveiro & Department of Physics, University of Aveiro, 3810-193 Aveiro, Portugal*

*<sup>c</sup>INL-International Iberian Nanotechnology Laboratory Av. Mestre Jose Veiga s/n 4715-330 Braga, Portugal*

*<sup>d</sup>Department of Material and Ceramic Engineering, University of Aveiro 3810-193, Aveiro, Portugal*

Figure S1 shows FT-IR spectra of GO, G/Ni<sub>3</sub>, G/Ni<sub>4</sub> and G/Ni<sub>5</sub> nanocomposites. GO profile pattern represents a complete oxidation of graphite. The broad band at high frequency (2800-3600) cm<sup>-1</sup> and also a band at 2360 cm<sup>-1</sup> related to vibration of OH group. Adsorption bands in 1722 cm<sup>-1</sup>, 1620 cm<sup>-1</sup> and 1044 cm<sup>-1</sup> confirmed the vibration of C=O (in COOH), C=C and C-O groups respectively. In RGO/Ni FTIR spectrum there are two weak peaks at 1558 cm<sup>-1</sup> and 1176 cm<sup>-1</sup>. The former is related to C-O vibration band and the later one is related to Graphene sheets vibration. The rest of oxygen functional groups are not exist anymore according to the reduction of graphene oxide [1].

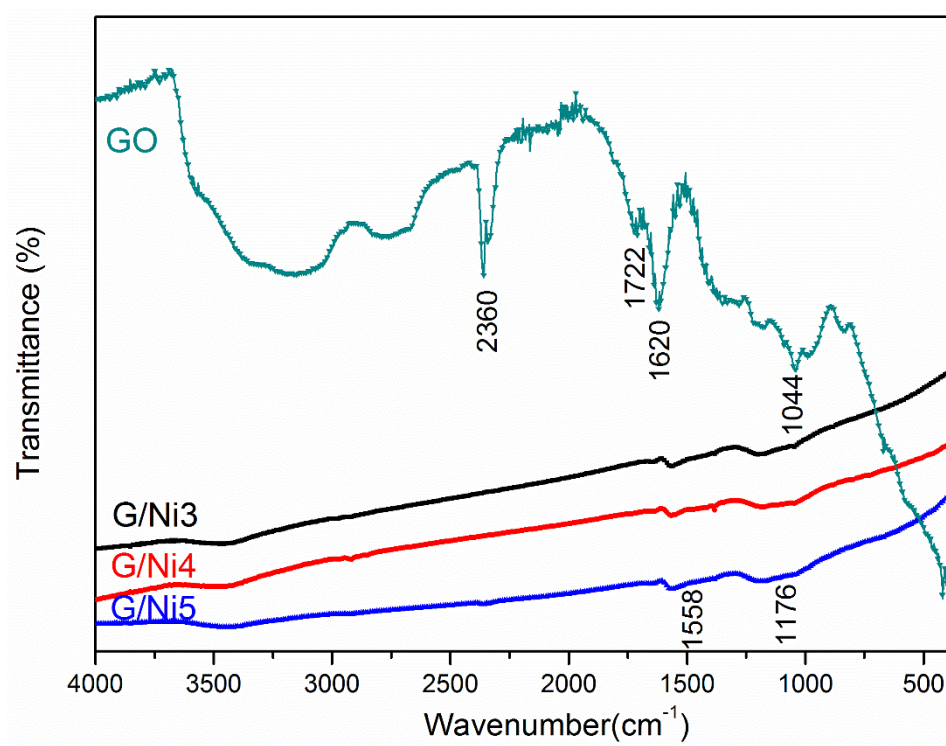

High-angle annular dark-field scanning transmission electron microscopy (HAADF-STEM) of G/Ni5 nanocomposite with corresponding elemental information in the core of a nickel particle and in a single nanothorn are shown in figures S2 and S3 respectively. This information indicated that the core and the nanothorn of nickel particle composed of about 99% metallic nickel and around 1 % oxygen. This confirmed a very thin oxidation layer covering the nickel particles both around the cores and the nanothorns.

**Figure S1.** FT-IR spectra of GO, G/Ni3, G/Ni4 and G/Ni5

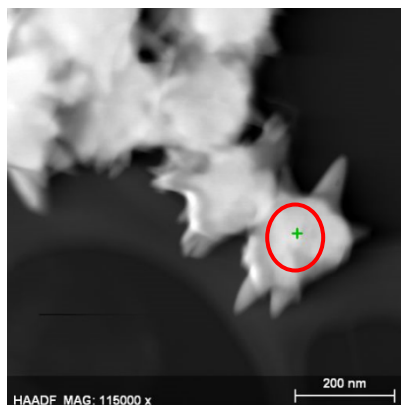

| Element | series   | Net     | [wt.%]   | [norm. wt.%] | [norm. at.%] | Error in wt.% (3 Sigma) |
|---------|----------|---------|----------|--------------|--------------|-------------------------|
| Oxygen  | K-series | 5062    | 1,14954  | 1,14954      | 4,091551     | 0,202793                |
| Nickel  | K-series | 1846671 | 98,85046 | 98,85046     | 95,90845     | 21,144                  |
|         |          | Sum:    | 100      | 100          | 100          |                         |

**Figure S2.** High-angle annular dark-field scanning transmission electron microscopy of G/Ni5 nanocomposite and corresponding elemental information at selected area of nickel core.

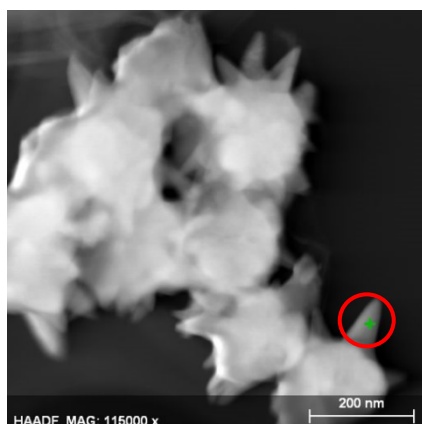

| Element | series   | Net    | [wt.%]   | [norm. wt.%] | [norm. at.%] | Error in wt.% (3 Sigma) |
|---------|----------|--------|----------|--------------|--------------|-------------------------|
| Oxygen  | K-series | 703    | 0,749622 | 0,749622     | 2,69604      | 0,189628                |
| Nickel  | K-series | 394874 | 99,25038 | 99,25038     | 97,30396     | 21,23402                |
|         |          | Sum:   | 100      | 100          | 100          |                         |

**Figure S3.** High-angle annular dark-field scanning transmission electron microscopy of G/Ni5 nanocomposite and corresponding elemental information at selected area of one single nanothorn.

## References

1. Ji, Z.Y., et al., *Reduced graphene oxide supported FePt alloy nanoparticles with high electrocatalytic performance for methanol oxidation*. New Journal of Chemistry, 2012. **36**(9): p. 1774-1780.
